# Supplementary material for: Drug Repurposing for Candidate SARS-CoV-2 Main Protease Inhibitors by a Novel In Silico Method
Source: MDPI journal article supplement (doi:10.3390/molecules25173830), 2020-08-23
Supplement: s1 [file s1]

| From   | To     | Type of interaction          |                            |
|--------|--------|------------------------------|----------------------------|
| SER1   | GLU166 | Hydrogen Bond; Electrostatic | Salt Bridge                |
| ARG4   | GLU290 | Hydrogen Bond; Electrostatic | Salt Bridge                |
| SER1   | GLU166 | Hydrogen Bond; Electrostatic | Salt Bridge                |
| ARG4   | GLU290 | Hydrogen Bond; Electrostatic | Salt Bridge                |
| ARG4   | GLU290 | Electrostatic                | Attractive Charge          |
| ARG4   | GLU290 | Electrostatic                | Attractive Charge          |
| SER1   | PHE140 | Hydrogen Bond                | Conventional Hydrogen Bond |
| ARG4   | LYS137 | Hydrogen Bond                | Conventional Hydrogen Bond |
| ALA7   | VAL125 | Hydrogen Bond                | Conventional Hydrogen Bond |
| SER10  | SER10  | Hydrogen Bond                | Conventional Hydrogen Bond |
| GLY11  | GLU14  | Hydrogen Bond                | Conventional Hydrogen Bond |
| VAL125 | ALA7   | Hydrogen Bond                | Conventional Hydrogen Bond |
| SER139 | GLN299 | Hydrogen Bond                | Conventional Hydrogen Bond |
| PHE140 | SER1   | Hydrogen Bond                | Conventional Hydrogen Bond |
| ARG298 | SER123 | Hydrogen Bond                | Conventional Hydrogen Bond |
| SER1   | PHE140 | Hydrogen Bond                | Conventional Hydrogen Bond |
| ARG4   | LYS137 | Hydrogen Bond                | Conventional Hydrogen Bond |
| ALA7   | VAL125 | Hydrogen Bond                | Conventional Hydrogen Bond |
| SER10  | SER10  | Hydrogen Bond                | Conventional Hydrogen Bond |
| GLY11  | GLU14  | Hydrogen Bond                | Conventional Hydrogen Bond |
| VAL125 | ALA7   | Hydrogen Bond                | Conventional Hydrogen Bond |
| SER139 | GLN299 | Hydrogen Bond                | Conventional Hydrogen Bond |
| PHE140 | SER1   | Hydrogen Bond                | Conventional Hydrogen Bond |
| ARG298 | SER123 | Hydrogen Bond                | Conventional Hydrogen Bond |
| GLY2   | GLY138 | Hydrogen Bond                | Carbon Hydrogen Bond       |
| GLY2   | GLY138 | Hydrogen Bond                | Carbon Hydrogen Bond       |
| ALA7   | VAL125 | Hydrophobic                  | Alkyl                      |
| PRO9   | PRO122 | Hydrophobic                  | Alkyl                      |
| PRO122 | PRO9   | Hydrophobic                  | Alkyl                      |
| VAL125 | VAL125 | Hydrophobic                  | Alkyl                      |
| ALA285 | ALA285 | Hydrophobic                  | Alkyl                      |

|        |        |             |          |
|--------|--------|-------------|----------|
| ALA285 | LEU286 | Hydrophobic | Alkyl    |
| ALA7   | VAL125 | Hydrophobic | Alkyl    |
| ALA285 | LEU286 | Hydrophobic | Alkyl    |
| TYR126 | ARG4   | Hydrophobic | Pi-Alkyl |
| TYR126 | MET6   | Hydrophobic | Pi-Alkyl |
| TYR126 | ARG4   | Hydrophobic | Pi-Alkyl |
| TYR126 | MET6   | Hydrophobic | Pi-Alkyl |
